# Supplementary material
Source: publisher site journal article supplement (https://www.dovepress.com/article/supplementary_file/591495/591495%20Supplementary%20Material.docx)
Supplement: Supplementary file 1 [file 591495%20Supplementary%20Material.docx]

**Supplementary Table S1. Descriptive statistics of LTCI benefit and long-term care service supply indicators across 16 prefecture-level cities in Shandong Province**

| **Indicator** | **Unit** | Statistic |
| --- | --- | --- |
| Participation rate | Ratio | 0.58 ± 0.31 (Mean ± SD) |
| Number of insured individuals | 1,000 persons | Median 632 [400–7,800] |
| Disability level coverage | level (1–4) | Median 2 [2–3] |
| Number of covered service items | items | Median 53 [45–62] |
| Reimbursement rate | % | 89.44 ± 7.77 (Mean ± SD) |
| Payment standard | RMB/month | Median 1,350 [1,100–1,600] |
| Number of beneficiaries | persons | Median 8,800 [3,500–18,000] |
| Benefit receipt ratio | ratio | 0.36 ± 0.17 (Mean ± SD) |
| Fund balance ratio | % | 36.85 ± 17.15 (Mean ± SD) |
| Per capita financing level | RMB/person | Median 60 [35–90] |
| Total fund expenditure | RMB | Median 500 [250–1,200] |
| Number of designated institutions | institutions | Median 120 [60–400] |
| Number of care beds | beds | Median 401 [321–521] |
| Care beds per 1,000 older adults | beds/1,000 | 0.36 ± 0.12 (Mean ± SD) |
| Total staff in designated institutions | persons | Median 12,000 [5,000–18,000] |
| Care workers per 1,000 older adults | persons/1,000 | 1.82 ± 1.67 (Mean ± SD) |
| Number of trained care workers | persons | Median 2,100 [750–4,500] |

Note: Statistics are based on city-level raw indicator values across 16 prefecture-level cities.

For skewed absolute value indicators, median [Q1–Q3] is reported; for ratio/proportion indicators, mean ± SD is reported. Disability level coverage indicates the number of disability/dementia severity levels covered under the local LTCI scheme, with higher values representing broader coverage.

**Supplementary Table S2. Indicator polarity used in min max normalization**

| **Indicator** | **Polarity** | **Interpretation** |
| --- | --- | --- |
| Participation rate | Positive | Higher values indicate broader LTCI coverage |
| Number of insured individuals | Positive | Higher values indicate greater enrollment scale |
| Disability level coverage | Positive | Higher values indicate broader disability or dementia coverage |
| Number of covered service items | Positive | Higher values indicate broader service coverage |
| Reimbursement rate | Positive | Higher values indicate stronger financial protection |
| Payment standard | Positive | Higher values indicate greater benefit generosity |
| Number of beneficiaries | Positive | Higher values indicate greater realized benefit penetration |
| Benefit receipt ratio | Positive | Higher values indicate stronger benefit penetration among the insured |
| Fund balance ratio | Positive | Higher values indicate stronger fund sustainability |
| Per capita financing level | Positive | Higher values indicate stronger financing capacity |
| Total fund expenditure | Positive | Higher values indicate greater benefit support capacity |
| Number of designated institutions | Positive | Higher values indicate stronger institutional service capacity |
| Number of care beds | Positive | Higher values indicate stronger bed capacity |
| Care beds per 1,000 older adults | Positive | Higher values indicate greater bed availability relative to the older population |
| Total staff in designated institutions | Positive | Higher values indicate stronger staffing capacity |
| Care workers per 1,000 older adults | Positive | Higher values indicate stronger care workforce availability |
| Number of trained care workers | Positive | Higher values indicate stronger trained workforce capacity |

Note: All indicators were treated as positive indicators in the normalization procedure, with higher values indicating better performance.

**Supplementary Table S3. Classification criteria for coupling coordination degree**

| D value range | Coordination grade | Coordination status |
| --- | --- | --- |
| 0.00 to 0.09 | 1 | Extreme maladjustment |
| 0.10 to 0.19 | 2 | Severe maladjustment |
| 0.20 to 0.29 | 3 | Moderate maladjustment |
| 0.30 to 0.39 | 4 | Mild maladjustment |
| 0.40 to 0.49 | 5 | Near maladjustment |
| 0.50 to 0.59 | 6 | Barely coordinated |
| 0.60 to 0.69 | 7 | Primary coordination |
| 0.70 to 0.79 | 8 | Intermediate coordination |
| 0.80 to 0.89 | 9 | Well coordinated |
| 0.90 to 1.00 | 10 | High quality coordination |

Note: D denotes the coupling coordination degree. Higher D values indicate better coordinated development.
